# Supplementary material for: Mn doping for regulating the electronic structure of Co 3 O 4 to construct dual active sites for oxygen electrocatalysis
Source: Royal Society of Chemistry journal article supplement (doi:10.1039/d4qi03005b), 2025-01-01
Supplement: d4qi03005b1.pdf [file d4qi03005b1.pdf]

1

2

## **Supporting Information**

3

### **Mn doping regulating electronic structure of $\text{Co}_3\text{O}_4$ to construct dual active sites for Oxygen electrocatalysis**

6

7 *Ziyi Shui<sup>a\*</sup>, Huiying Tian<sup>c</sup>, Hang Mu<sup>d</sup>, Liuyun Xu<sup>a</sup>, Xiaoming Gao<sup>a\*</sup>, Xi Chen<sup>b\*</sup>*

8

9 *<sup>a</sup> College of Chemistry & Chemical Engineering, Yan'an University, Yan'an 716009, China*

10 *<sup>b</sup> School of Interdisciplinary Studies, Lingnan University, Hong Kong, China*

11 *<sup>c</sup> School of Chemistry and Chemical Engineering, Jining Normal University, Ulanqab 012000,*  
12 *China*

13 *<sup>d</sup> Northwest Rubber & Plastics Research & Design Institute Co.,Ltd. Xian yang, 712023, China*

14

15 Corresponding Author

16 \*E-mail: m18182696780@163.com (Z. S.); ydgaoxm@126.com (X. G.); xichen863@hotmail.com  
17 (X. C.).

18

## Experimental Methods

1

### 2 **1. Materials syntheses**

3 The  $\text{MnCo}_2\text{O}_4$  catalyst was synthesized by a hydrothermal method. In a typical procedure, 0.289 g of  
4  $\text{Co}(\text{NO}_3)_2 \cdot 6\text{H}_2\text{O}$  and 0.125 g of  $\text{Mn}(\text{NO}_3)_2 \cdot 4\text{H}_2\text{O}$  were dissolved in 50 mL of deionized water with  
5 vigorous stirring to form a transparent solution. Subsequently, 50 mL of NaOH solution was  
6 introduced into the mixture. After stirring for 1 hour, the resulting precipitate was collected by  
7 centrifugation, washed several times with ethanol and deionized water, and then dried overnight. The  
8 dried products were ground into a fine powder and calcined at 500 °C in air for 3 hours to obtain  
9  $\text{MnCo}_2\text{O}_4$  nanoparticles. For comparison, pristine  $\text{Co}_3\text{O}_4$  was synthesized using the same procedure,  
10 excluding the addition of  $\text{Mn}(\text{NO}_3)_2 \cdot 4\text{H}_2\text{O}$ .

### 11 **2. Materials characterization**

12 The crystal structure and phase composition of the samples were qualitatively analyzed by powder  
13 X-ray diffraction (Rigaku Ultima IV). X-ray photoelectron spectroscopy (XPS, Thermo Scientific  
14 ESCALAB Xi+) was conducted to investigate the surface chemical composition, with Al  $K\alpha$  X-  
15 rays as the excitation source. The morphology and structure were observed by scanning electron  
16 microscopy (SEM, JEOL (JSM-7610 F)) and transmission electron microscope (TEM, JEOL F200).  
17 The surface areas of the samples were examined by the Brunauer-Emmett-Teller (BET) method with  
18 a Micromeritics ASAP 2450 instrument, while the pore size distributions were determined by the  
19 Barrett-Joyner-Halenda (BJH) method from the adsorption branches of the isotherms.

### 20 **3. Electrochemical measurements**

1 The electrochemical techniques of linear sweep voltammetry (LSV), Tafel plot (TAFEL),  
2 electrochemical impedance spectroscopy (EIS) and chronoamperometry (CA) were conducted using  
3 a CHI 760E electrochemical workstation with a rotating disk-ring electrode (RRDE) in 0.1 M KOH  
4 solution at room temperature (25°C). The typical three-electrode setup consisted of a glassy carbon  
5 working electrode, an Ag/AgCl reference electrode, and a graphite rod counter electrode. A catalyst  
6 mixture was prepared by sonicating 5 mg of catalyst, 5 mg of black carbon, 40  $\mu\text{L}$  of Nafion, and 1  
7 mL of ethanol for 1 hour to create a homogeneous ink. Subsequently, 5  $\mu\text{L}$  of catalyst ink was  
8 deposited on the glassy carbon electrode (GC), with an area of 0.1965  $\text{cm}^2$ . The polarization curves  
9 for ORR/OER were measured on the electrochemical workstation, with all potentials corrected to the  
10 reversible hydrogen electrode (RHE) and for IR drop.

#### 11 **4. Rechargeable zinc-air battery**

12 To assess the practical application potential of the as-prepared catalysts, the catalyst inks was coated  
13 on commercial carbon cloths as air cathodes with a loading of 2  $\text{mg}\cdot\text{cm}^{-2}$ . Zinc foil anode was  
14 dissolved in a solution of 6 M KOH and 0.2 M  $\text{Zn}(\text{Ac})_2$  to form zincate. The charge-discharge cycle  
15 performance of the battery was evaluated by LADN electricity, and the open-circuit voltage along  
16 with the charge-discharge polarization curves were measured by the CHI 760E electrochemical  
17 workstation.

#### 18 **5. Theoretical calculations**

19 The energy barrier of  $\text{Co}_3\text{O}_4$  and  $\text{MnCo}_2\text{O}_4$  was performed using DFT with the Vienna ab initio  
20 simulation package (VASP) <sup>1-2</sup>. The Perdew-Burke-Ernzerhof (PBE) generalized gradient  
21 approximation (GGA) was applied for the exchange-correlation energy functional<sup>3-4</sup>. The projected  
22 augmented wave (PAW) pseudopotential depicted the ion core with periodic boundary conditions<sup>5</sup>.

1 A  $2 \times 1$  supercell consisting of three layers of  $\text{Co}_3\text{O}_4$  (100) and  $\text{MnCo}_2\text{O}_4$  (100) surfaces was  
 2 constructed for the models. Geometry optimizations and free energy assessments were carried out  
 3 with convergence thresholds of  $10^{-6}$  eV for energy and  $0.01$  eV/Å for force. To address self-  
 4 interaction errors due to strong correlation effects in 3d transition metal oxides, the Hubbard U  
 5 parameter (GGA+U) was applied to Mn and Co with values of 3.96 eV and 3.4 eV, respectively<sup>6-7</sup>.  
 6 A 15 Å vacuum in the z-direction minimized interactions between periodic images.

7 The free energy of ORR/OER was calculated by using the equation:

$$8 \quad \Delta G = E_{\text{surface} + \text{adsorbate}} - E_{\text{surface}} - E_{\text{adsorbate}} + \Delta E_{\text{ZPE}} - T\Delta S \quad (1)$$

9 where G, E, ZPE and TS represent the free energy, total energy from DFT calculations, zero-point  
 10 energy and entropic contributions, respectively.

11 Computational hydrogen electrode (CHE) model was used to study the thermodynamics of ORR and  
 12 OER on catalysts. In CHE model, the free energy of  $(\text{H}^+ + \text{e}^-)$  equals to  $(1/2 \text{H}_2 (\text{g}))$  for standard  
 13 hydrogen electrode (SHE). For the four-electron pathway ORR in an alkaline electrolyte, the overall  
 14 reaction is divided into four elementary steps:

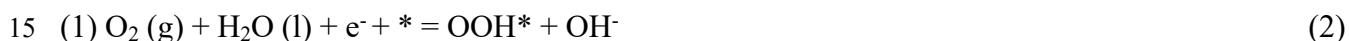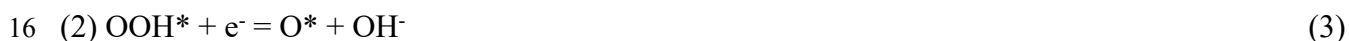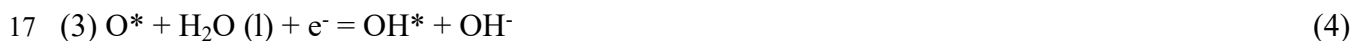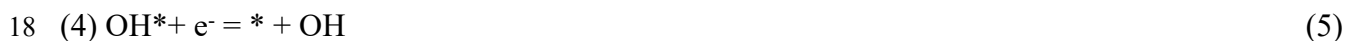

19 where the asterisk denotes a surface-bound species. For OER in an alkaline electrolyte, the overall  
 20 reaction is the reverse reaction of ORR.

21 The Gibbs free energies of ORR and OER were calculated according to the method developed by  
 22 Nørskov and his co-workers<sup>8-9</sup>.

$$23 \quad U_{\text{L,ORR}} = 1.23 - \min \{ \Delta G_{1-4} \} / e \quad (6)$$

1 
$$U_{L,OER} = \max \{ \Delta G_{1-4} \} e - 1.23 \quad (7)$$

2 For OER on both RuO<sub>2</sub> and MnO<sub>2</sub>, either step (2) or step (3) is potential determining, while the  
 3 limiting potential of ORR is raised from step (1) or step (4). Applying the linear scaling relation  
 4 between  $\Delta G_{OH}$  and  $\Delta G_{OOH}$  ( $\Delta G_{OOH} = \Delta G_{OH} + 3.2$ ).

5 
$$U_{L,ORR} = 1.23 - \min \{ \Delta G_{OH}, 4.92 - (3.2 + \Delta G_{OH}) \} / e \quad (8)$$

6 
$$U_{L,OER} = \max \{ \Delta G_O - \Delta G_{OH}, 3.2 - (\Delta G_O - \Delta G_{OH}) \} / e - 1.23 \quad (9)$$

7 The optimum  $\Delta G_{OH}$  for ORR is derived as  $(4.92 - 3.2) / 2 = 0.86$  eV, and the optimum  $\Delta G_O - \Delta G_{OH}$  for  
 8 OER is thus set to  $3.2 / 2 = 1.6$  eV. Notably, the above derivation of optimal descriptor value is only for  
 9 guiding the catalysts screening, the variation of the linear scaling relation will cause the deviation of  
 10 the optimal descriptor value.

## Supplementary Results

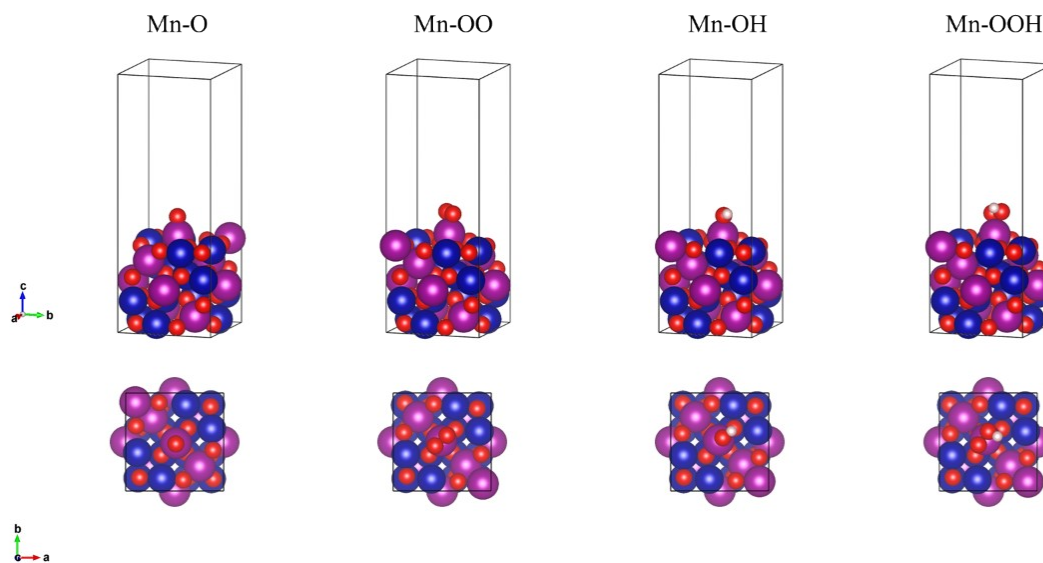

Fig. S1 The various adsorption intermediates on Mn site in the modes of  $\text{MnCo}_2\text{O}_4$ .

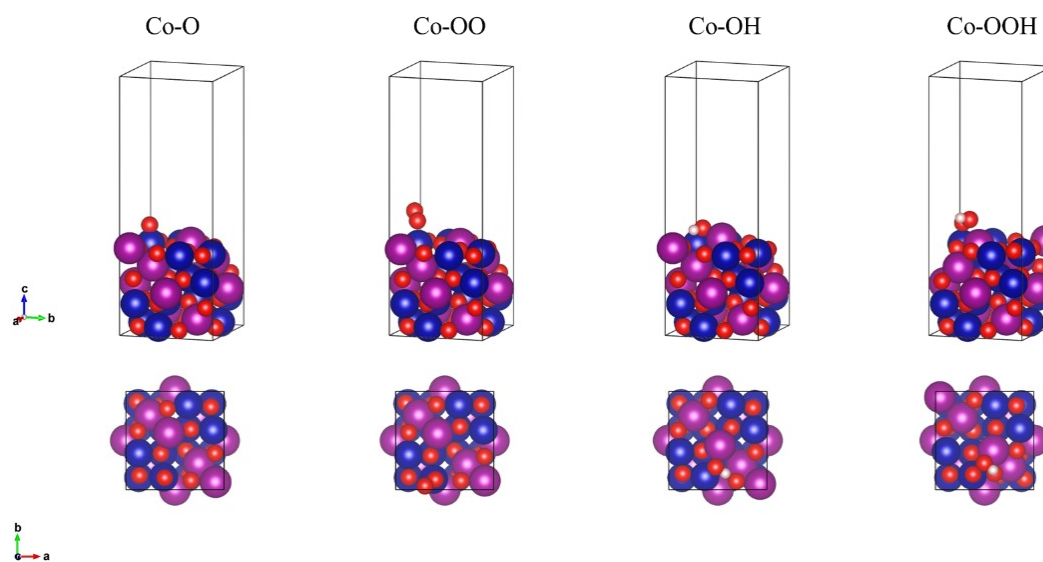

Fig. S2 The various adsorption intermediates on Mn site in the modes of  $\text{MnCo}_2\text{O}_4$ .

1  
2

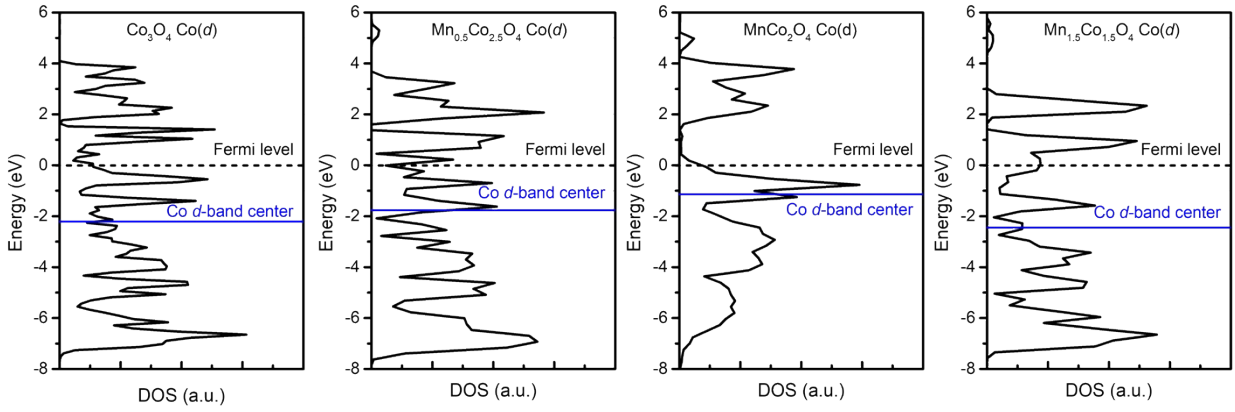

3

4 **Fig. S3** Co d-band center relative to the Fermi surface of  $\text{Co}_3\text{O}_4$ ,  $\text{Mn}_{0.5}\text{Co}_{2.5}\text{O}_4$ ,  $\text{MnCo}_2\text{O}_4$ , and  
5  $\text{Mn}_{1.5}\text{Co}_{1.5}\text{O}_4$ .

6

7

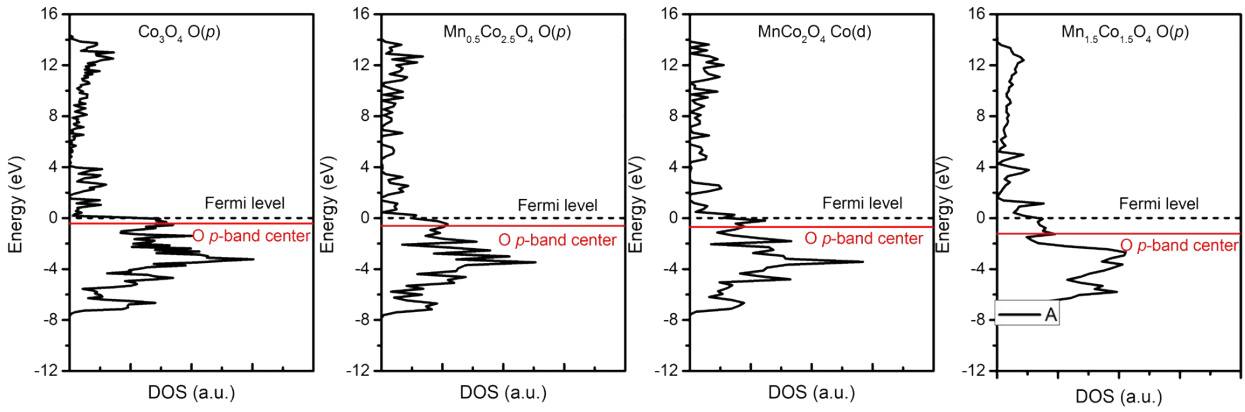

8

9 **Fig. S4** O p-band centers relative to the Fermi surface of  $\text{Co}_3\text{O}_4$ ,  $\text{Mn}_{0.5}\text{Co}_{2.5}\text{O}_4$ ,  $\text{MnCo}_2\text{O}_4$ , and  
10  $\text{Mn}_{1.5}\text{Co}_{1.5}\text{O}_4$ .

11

12

1

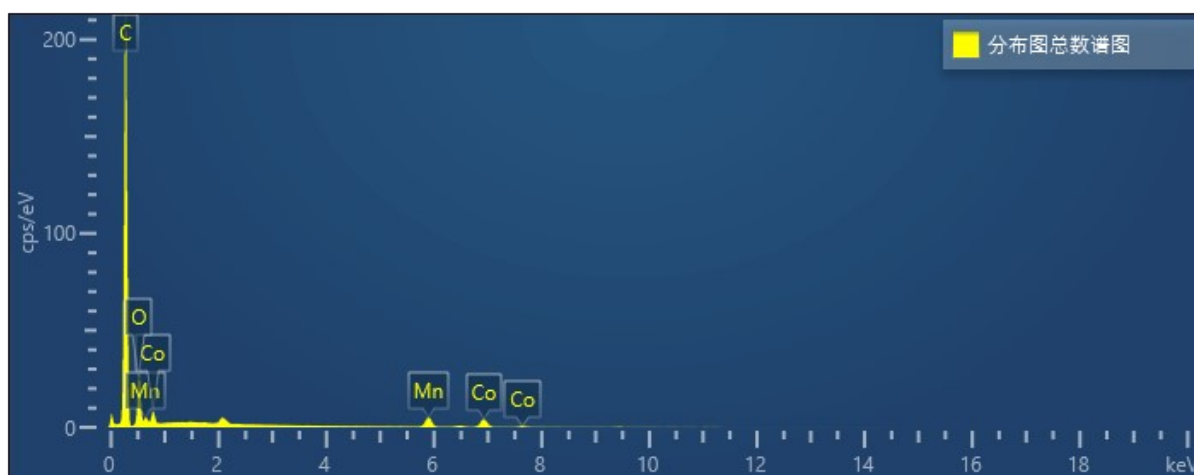

2

3 **Fig. S5** EDS spectrum of  $\text{MnCo}_2\text{O}_4$  catalyst.

4

5

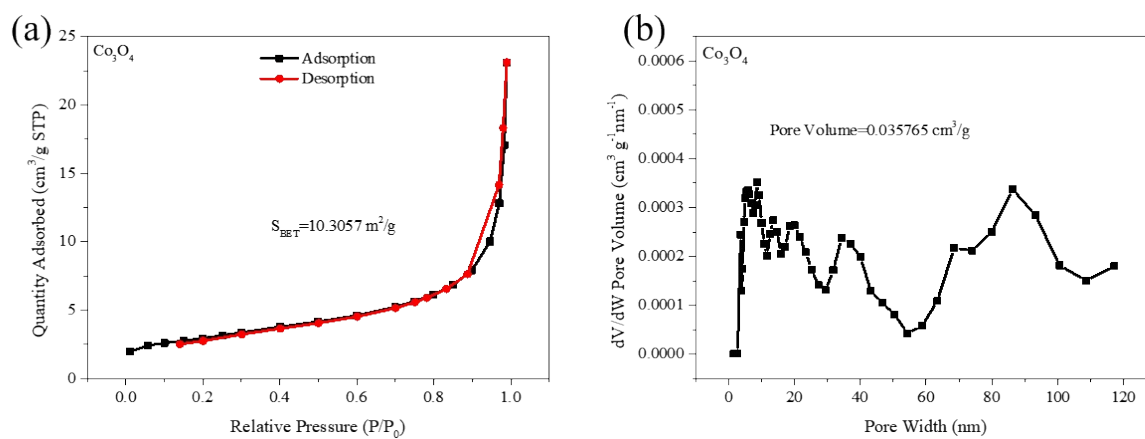

6

7 **Fig. S6** (a) Nitrogen adsorption-desorption isotherms; (b) pore size distribution of  $\text{Co}_3\text{O}_4$  catalysts.

8

9

10

11



1

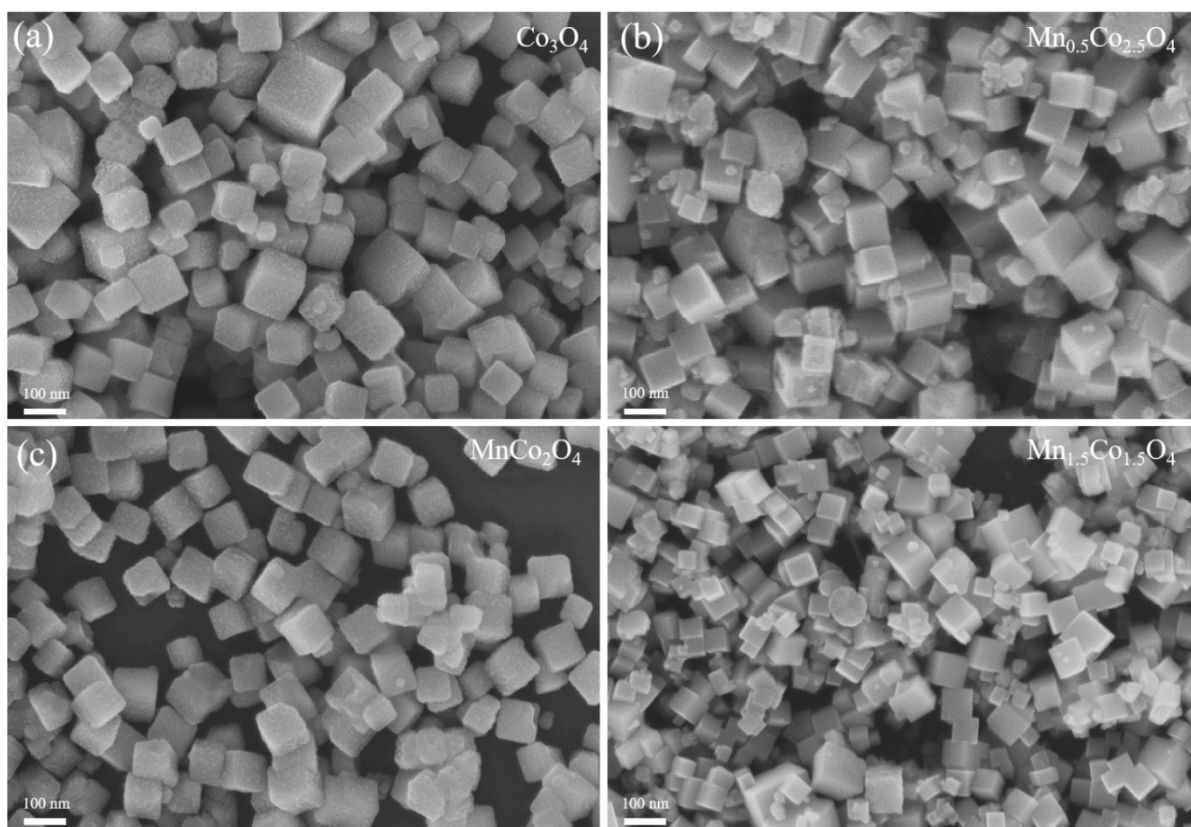

2

3 **Fig. S7** SEM images of (a)  $\text{Co}_3\text{O}_4$ , (b)  $\text{Mn}_{0.5}\text{Co}_{2.5}\text{O}_4$ , (c)  $\text{MnCo}_2\text{O}_4$ , (d)  $\text{Mn}_{1.5}\text{Co}_{1.5}\text{O}_4$  catalysts.

4

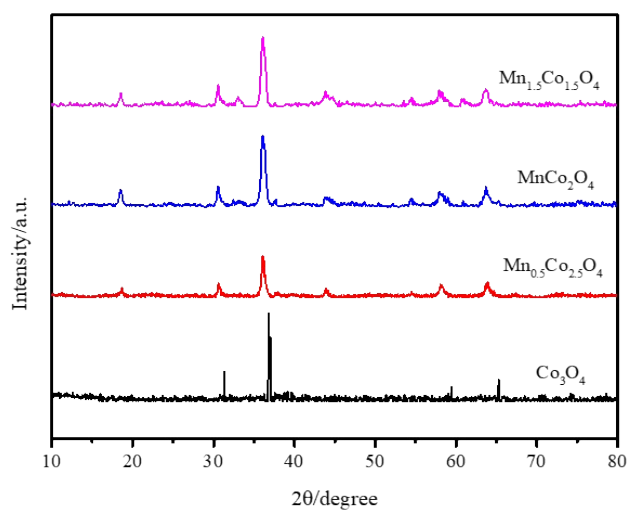

5

6 **Fig. S8** XRD patterns of  $\text{Co}_3\text{O}_4$ ,  $\text{Mn}_{0.5}\text{Co}_{2.5}\text{O}_4$ ,  $\text{MnCo}_2\text{O}_4$ , and  $\text{Mn}_{1.5}\text{Co}_{1.5}\text{O}_4$  catalysts.

7

1

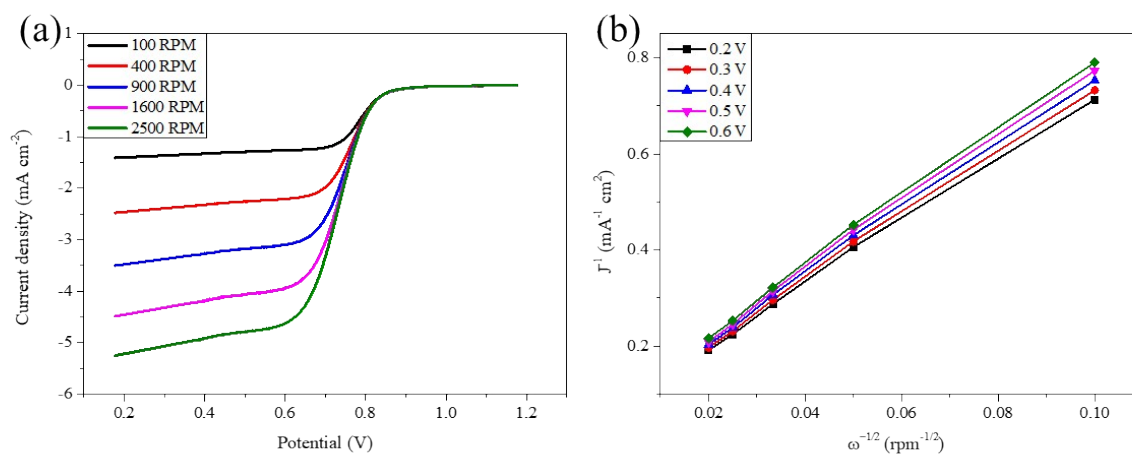

2

3 **Fig. S9** RDE measure at the different rotation rates and K-L plots of the Co<sub>3</sub>O<sub>4</sub>.

4

5

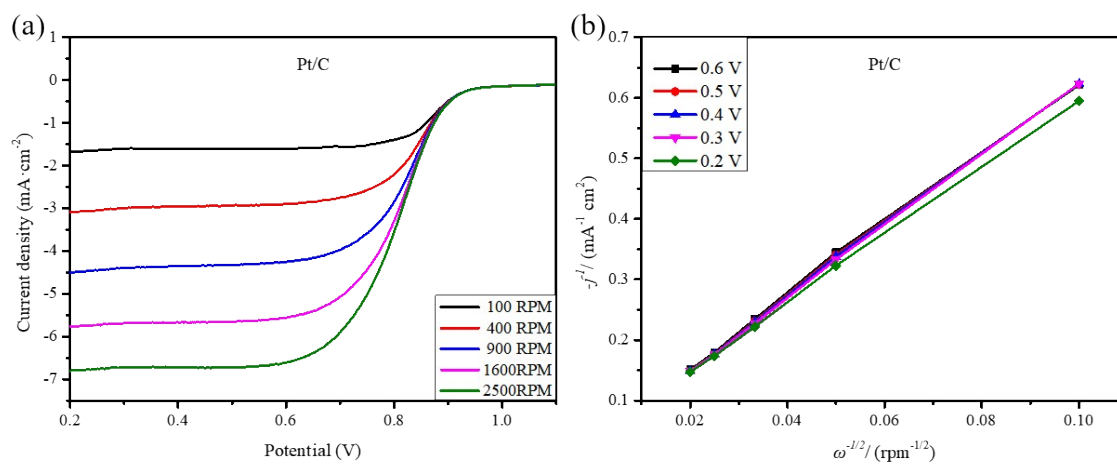

6

7 **Fig. S10** RDE measure at the different rotation rates and K-L plots of the Pt/C.

8

9

10

11

12

1

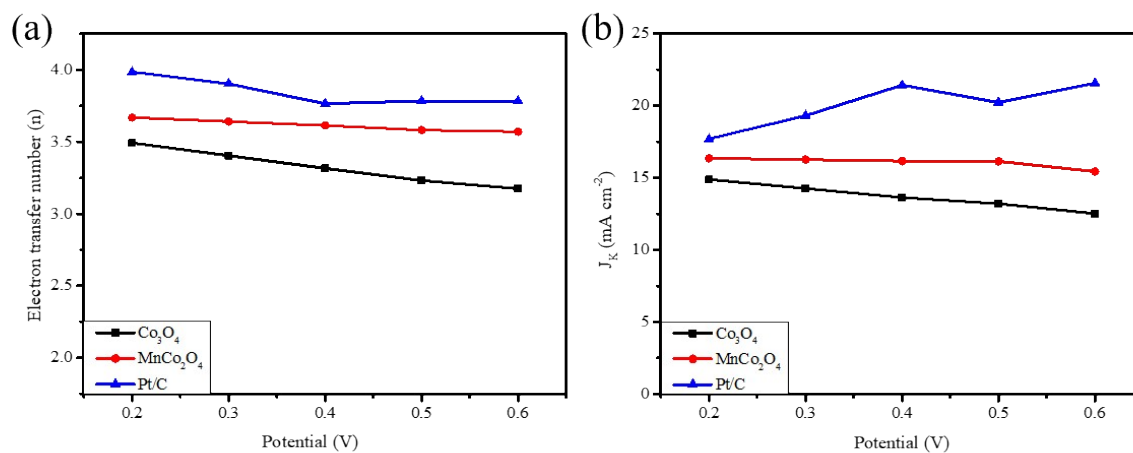

2

3 **Fig. S11** n and J<sub>K</sub> values of the Co<sub>3</sub>O<sub>4</sub> and MnCo<sub>2</sub>O<sub>4</sub>.

4

5

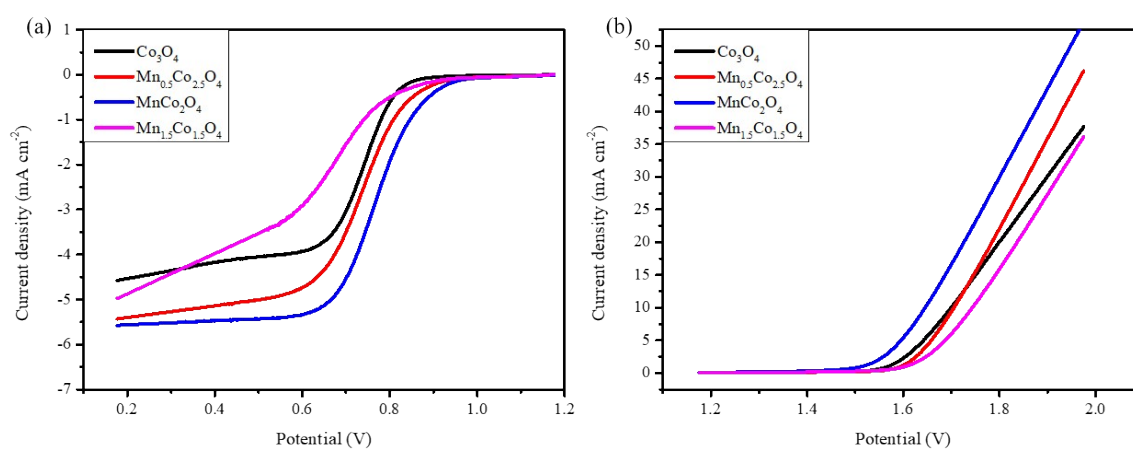

6

7 **Fig. S12** (a) Oxygen reduction polarization curve and (b) Oxygen evolution polarization curve of

8 Co<sub>3</sub>O<sub>4</sub>, Mn<sub>0.5</sub>Co<sub>2.5</sub>O<sub>4</sub>, MnCo<sub>2</sub>O<sub>4</sub>, and Mn<sub>1.5</sub>Co<sub>1.5</sub>O<sub>4</sub> catalysts.

9

10

11

12

13

1

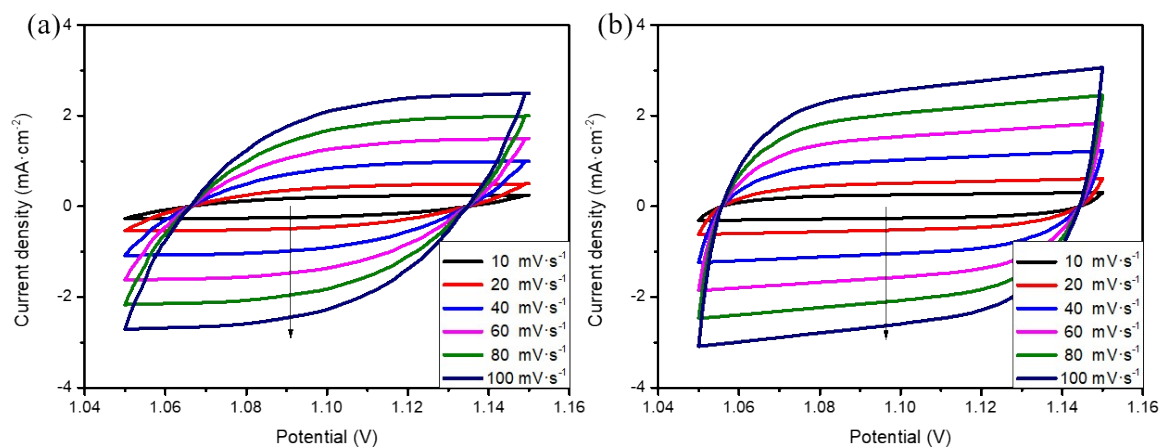

2

3 **Fig. S13** CV curves at different scan rates of (a)  $\text{Co}_3\text{O}_4$  and (b)  $\text{MnCo}_2\text{O}_4$ .

4

5

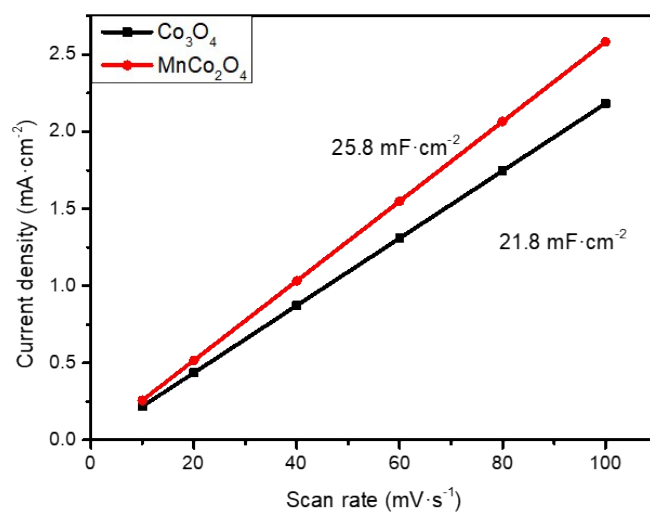

6

7 **Fig. S14** double-layer capacitance ( $C_{dl}$ ) values determined by electrochemically active surface area

8 (ECSA) of  $\text{Co}_3\text{O}_4$  and  $\text{MnCo}_2\text{O}_4$ .

9

10

11

1

2

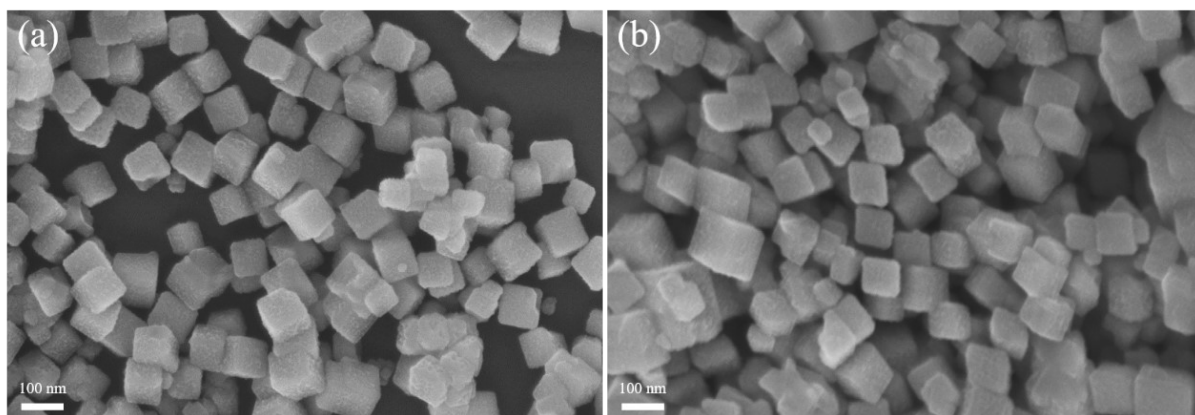

3

4 **Fig. S15** SEM images of MnCo<sub>2</sub>O<sub>4</sub> catalyst (a) before and (b) after ORR stability testing.

5

6

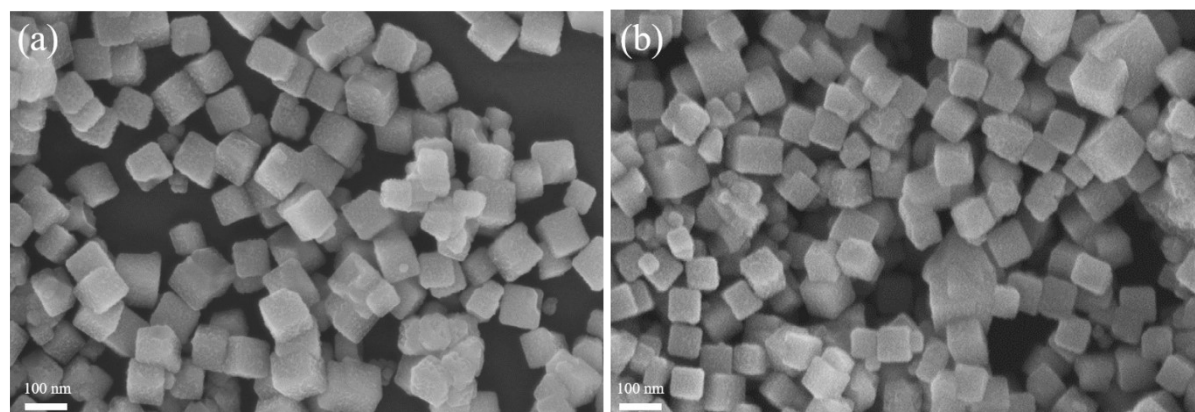

7

8 **Fig. S16** SEM images of the MnCo<sub>2</sub>O<sub>4</sub> catalyst (a) before and (b) after OER stability testing.

9

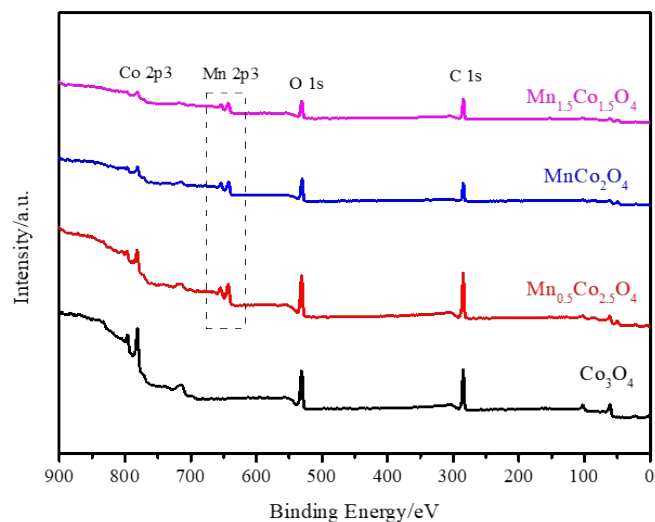

1

2 **Fig. S17** XPS spectra of Co<sub>3</sub>O<sub>4</sub>, Mn<sub>0.5</sub>Co<sub>2.5</sub>O<sub>4</sub>, MnCo<sub>2</sub>O<sub>4</sub>, and Mn<sub>1.5</sub>Co<sub>1.5</sub>O<sub>4</sub> catalysts.

3

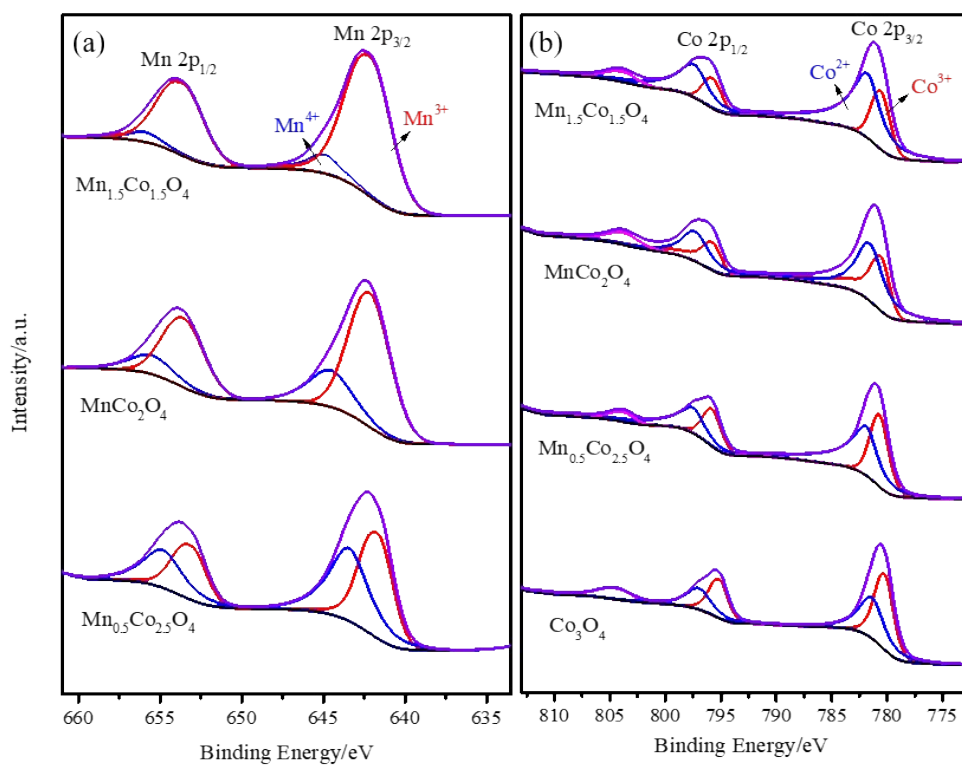

4

5 **Fig. S18** (a) High-resolution Co 2p spectra and (c) High-resolution Mn 2p spectra of Co<sub>3</sub>O<sub>4</sub>,

6 Mn<sub>0.5</sub>Co<sub>2.5</sub>O<sub>4</sub>, MnCo<sub>2</sub>O<sub>4</sub>, and Mn<sub>1.5</sub>Co<sub>1.5</sub>O<sub>4</sub> catalysts.

7

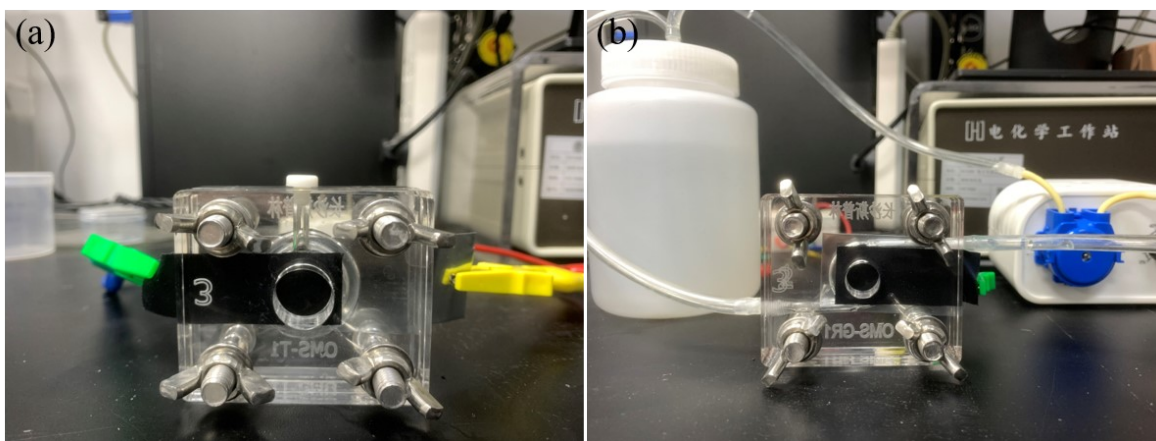

1

2 **Fig. S19** The photograph of the assembled Zn-air batteries.

3

4

1

2 **Table S1** EDS spectrum results of MnCo<sub>2</sub>O<sub>4</sub> catalyst.

| <i>Spectrum</i> |                                |                                |
|-----------------|--------------------------------|--------------------------------|
| <i>Element</i>  | <i>Weight percentage (wt%)</i> | <i>Atomic percentage (At%)</i> |
| <i>C K</i>      | 76.58                          | 85.98                          |
| <i>O K</i>      | 13.98                          | 11.79                          |
| <i>Mn K</i>     | 2.96                           | 0.73                           |
| <i>Co K</i>     | 6.48                           | 1.50                           |
| <i>Total</i>    | 100.00                         | 100.00                         |

3

4

5 **Table S2** XPS and ICP-OES results of Mn<sub>X</sub>Co<sub>3-X</sub>O<sub>4</sub> (X = 0, 0.5, 1, 1.5) catalysts

| Samples                                            | Elements | XPS results      |       | ICP-OES results |       |
|----------------------------------------------------|----------|------------------|-------|-----------------|-------|
|                                                    |          | Atomic ratio (%) | Mn/Co | Mass ratio (%)  | Mn/Co |
| Co <sub>3</sub> O <sub>4</sub>                     | Mn       | 0                | 0     | 0               | 0     |
|                                                    | Co       | 8.64             |       | 69.65           |       |
| Mn <sub>0.5</sub> Co <sub>2.5</sub> O <sub>4</sub> | Mn       | 1.60             | 0.203 | 12.43           | 0.199 |
|                                                    | Co       | 7.89             |       | 65.49           |       |
| MnCo <sub>2</sub> O <sub>4</sub>                   | Mn       | 3.29             | 0.491 | 26.21           | 0.485 |
|                                                    | Co       | 6.70             |       | 56.90           |       |
| Mn <sub>1.5</sub> Co <sub>1.5</sub> O <sub>4</sub> | Mn       | 4.62             | 0.956 | 39.04           | 0.947 |
|                                                    | Co       | 4.83             |       | 43.45           |       |

6

7

8

9



1

2 **Table S3** ORR onset potential, half-wave potential, limit diffusion current density, Tafel slope,  
 3 electron transfer number, and kinetic current density of  $\text{Co}_3\text{O}_4$ ,  $\text{Mn}_{0.5}\text{Co}_{2.5}\text{O}_4$ ,  $\text{MnCo}_2\text{O}_4$ ,  
 4  $\text{Mn}_{1.5}\text{Co}_{1.5}\text{O}_4$  and Pt/C catalysts

| Sample                                     | ORR                    |               |                                          |                                                 |      |                                          |
|--------------------------------------------|------------------------|---------------|------------------------------------------|-------------------------------------------------|------|------------------------------------------|
|                                            | $E_{\text{onset}}$ (V) | $E_{1/2}$ (V) | $J_L$ ( $\text{mA}\cdot\text{cm}^{-2}$ ) | Tafel slope ( $\text{mV}\cdot\text{dec}^{-1}$ ) | n    | $J_K$ ( $\text{mA}\cdot\text{cm}^{-2}$ ) |
| $\text{Co}_3\text{O}_4$                    | 0.871                  | 0.747         | 4.16                                     | 84.3                                            | 3.49 | 14.89                                    |
| $\text{Mn}_{0.5}\text{Co}_{2.5}\text{O}_4$ | 0.947                  | 0.745         | 5.43                                     | /                                               | /    | /                                        |
| $\text{MnCo}_2\text{O}_4$                  | 0.976                  | 0.775         | 5.58                                     | 81.6                                            | 3.67 | 16.36                                    |
| $\text{Mn}_{1.5}\text{Co}_{1.5}\text{O}_4$ | 0.933                  | 0.667         | 4.98                                     | /                                               | /    | /                                        |
| Pt/C                                       | 0.977                  | 0.849         | 5.92                                     | 59.6                                            | 3.98 | 17.71                                    |

5

6

7 **Table S4** Potential at 10  $\text{mA cm}^{-2}$ , overpotential, Tafel slope, charge transfer resistance and mass  
 8 activity of  $\text{Co}_3\text{O}_4$ ,  $\text{Mn}_{0.5}\text{Co}_{2.5}\text{O}_4$ ,  $\text{MnCo}_2\text{O}_4$ ,  $\text{Mn}_{1.5}\text{Co}_{1.5}\text{O}_4$  and  $\text{RuO}_2$  catalysts

| Sample                                     | OER            |             |                                                 |                              |                                     |
|--------------------------------------------|----------------|-------------|-------------------------------------------------|------------------------------|-------------------------------------|
|                                            | $E_{j=10}$ (V) | $\eta$ (mV) | Tafel slope ( $\text{mV}\cdot\text{dec}^{-1}$ ) | $R_{\text{ct}}$ ( $\Omega$ ) | MA ( $\text{A}\cdot\text{g}^{-1}$ ) |
| $\text{Co}_3\text{O}_4$                    | 1.70           | 470         | 82.6                                            | 44.3                         | 34.4                                |
| $\text{Mn}_{0.5}\text{Co}_{2.5}\text{O}_4$ | 1.706          | 476         | /                                               | /                            | /                                   |
| $\text{MnCo}_2\text{O}_4$                  | 1.646          | 416         | 62.9                                            | 26.14                        | 87.6                                |
| $\text{Mn}_{1.5}\text{Co}_{1.5}\text{O}_4$ | 1.777          | 547         | /                                               | /                            | /                                   |
| $\text{RuO}_2$                             | 1.646          | 416         | 108.6                                           | /                            | 87.8                                |

9

10

11

1

2 **Table S5** Cobalt, manganese and oxygen content obtained from XPS of  $\text{Co}_3\text{O}_4$ ,  $\text{Mn}_{0.5}\text{Co}_{2.5}\text{O}_4$ ,

3  $\text{MnCo}_2\text{O}_4$ , and  $\text{Mn}_{1.5}\text{Co}_{1.5}\text{O}_4$  catalysts.

| Sample                                     | Surface Content (%)             |                                 |                                                |
|--------------------------------------------|---------------------------------|---------------------------------|------------------------------------------------|
|                                            | $\text{Co}^{2+}/\text{Co}^{3+}$ | $\text{Mn}^{3+}/\text{Mn}^{4+}$ | $\text{O}_{\text{ads}}/\text{O}_{\text{latt}}$ |
| $\text{MnO}_2$                             | /                               | 1.58                            | 0.51                                           |
| $\text{Co}_3\text{O}_4$                    | 0.90                            | /                               | 0.49                                           |
| $\text{Mn}_{0.5}\text{Co}_{2.5}\text{O}_4$ | 0.95                            | 1.38                            | /                                              |
| $\text{MnCo}_2\text{O}_4$                  | 1.18                            | 1.98                            | 0.68                                           |
| $\text{Mn}_{1.5}\text{Co}_{1.5}\text{O}_4$ | 1.15                            | 1.88                            | /                                              |

4

**Table S6** Performance comparison between Mn-Co<sub>2</sub>O<sub>4</sub> and other recently reported electrocatalysts.

| Sample                                                                                                 | ORR              |             |           | OER               |             |           | $\Delta E$ | ZAB stability |
|--------------------------------------------------------------------------------------------------------|------------------|-------------|-----------|-------------------|-------------|-----------|------------|---------------|
|                                                                                                        | E <sub>1/2</sub> | Tafel slope | Stability | E <sub>j=10</sub> | Tafel slope | Stability |            |               |
| Mn-Co <sub>2</sub> O <sub>4</sub>                                                                      | 0.775            | 81.6        | 1.14%     | 1.646             | 62.9        | 1.55%     | 0.871      | 70            |
| Co <sub>3</sub> O <sub>4</sub>                                                                         | 0.747            | 84.3        | 8%        | 1.70              | 82.6        | 2.82%     | 0.953      |               |
| Pt/C                                                                                                   | 0.849            | 59.6        |           | 1.99              | 201.5       |           | 1.141      |               |
| RuO <sub>2</sub>                                                                                       | 0.6              | 100.3       |           | 1.646             | 63.5        |           | 1.046      |               |
| $\alpha$ -MnO <sub>2</sub> -H <sub>2</sub> <sup>10</sup>                                               | 0.73             | 84.6        | 5%        | 1.742             | 199.6       | 40%       | 1.012      |               |
| RuO <sub>2</sub> -carbon nanofiber arrays <sup>11</sup>                                                | 0.75             |             |           | 1.65              |             |           | 0.9        | 33.3          |
| La <sub>1.5</sub> Sr <sub>0.5</sub> NiMn <sub>0.5</sub> Ru <sub>0.5</sub> O <sub>6</sub> <sup>12</sup> | 0.73             |             |           | 1.66              |             |           | 0.93       |               |
| NiFe <sub>2</sub> O <sub>4</sub> -FeNi <sub>2</sub> S <sub>4</sub> <sup>13</sup>                       | 0.507            |             |           | 1.659             |             |           | 1.152      | 125           |
| ZNCO-NCNTs <sup>14</sup>                                                                               | 0.78             | 78          |           | 1.64              | 118.3       |           | 0.86       | 33.3          |
| Co <sub>3</sub> O <sub>4</sub> -LSC <sup>15</sup>                                                      | 0.69             | 54          |           | 1.61              | 75          |           | 0.92       |               |
| NDC-800 <sup>16</sup>                                                                                  | 0.85             | 79.53       | 3.38%     | 1.63              | 170.28      |           | 0.80       | 50            |
| Co/Co <sub>9</sub> S <sub>8</sub> /rGO/MWCNT-800 <sup>17</sup>                                         | 0.75             | 72          | 1.8%      | 1.68              | 166         |           | 0.89       |               |

## References

1. P. C. Hohenberg, W. Kohn, Inhomogeneous Electron Gas, *Phys. Rev.*, 1964, **136**, B864.
2. G. Kresse, J. Furthmüller, Efficient Iterative Schemes for Ab Initio Total-Energy Calculations Using a Plane-Wave Basis Set, *Phys. Rev. B, Condens. Matter*, 1996, **54**, 11169.
3. J. P. Perdew, K. Burke, M. Ernzerhof, Generalized Gradient Approximation Made Simple, *Phys. Rev. Lett.*, 1996, **77**, 3865-3868.
4. G. Kresse, J. Furthmüller, Efficiency of ab-initio total energy calculations for metals and semiconductors using a plane-wave basis set, *Comput. Mater. Sci.*, 1996, **6**, 15-50.
5. G. Kresse, D. Joubert, From ultrasoft pseudopotentials to the projector augmented-wave method, *Phys. Rev. B*, 1999, **59**, 1758-1775.
6. L. Wang, T. Maxisch, G. Ceder, Oxidation energies of transition metal oxides within the GGA+U framework, *Phys. Rev. B, Condens. Matter*, 2006, **73**, 195107.
7. M. T. Curnan, J. R. Kitchin, Effects of Concentration, Crystal Structure, Magnetism, and Electronic Structure Method on First-Principles Oxygen Vacancy Formation Energy Trends in Perovskites, *J. Phys. Chem. C*, 2014, **18**, 28776-28790.
8. V. Viswanathan, H. A. Hansen, J. Rossmeisl, J. K. Nørskov, Universality in Oxygen Reduction Electrocatalysis on Metal Surfaces, *ACS Catal.* 2012, **2**, 1654-1660.
9. I. C. Man, H.-Y. Su, F. Calle-Vallejo, H. A. Hansen, J. I. Martínez, N. G. Inoglu, J. Kitchin, T. F. Jaramillo, J. K. Nørskov, J. Rossmeisl, Universality in Oxygen Evolution Electrocatalysis on Oxide Surfaces, *ChemCatChem*, 2011, **3**, 1159-1165.
10. Q. Zhuang, N. Ma, Z. Yin, X. Yang, Z. Yin, J. Gao, Y. Xu, Z. Gao, H. Wang, J. Kang, D. Xiao, J. Li, X. Li, D. Ma, Rich Surface Oxygen Vacancies of MnO<sub>2</sub> for Enhancing Electrocatalytic Oxygen Reduction and Oxygen Evolution Reactions, *Adv. Energy Sustain. Res.*, 2021, **2**, 2100030.
11. Z. Guo, C. Li, W. Li, H. Guo, X. Su, P. He, Y. Wang, Y. Xia, Ruthenium oxide coated ordered mesoporous carbon nanofiber arrays: a highly bifunctional oxygen electrocatalyst for rechargeable Zn–air batteries, *J. Mater. Chem. A*, 2016, **4**, 6282-6289.
12. M. Retuerto, F. Calle-Vallejo, L. Pascual, G. Lumbeck, M. T. Fernandez-Diaz, M. Croft, J. Gopalakrishnan, M. A. Peña, J. Hadermann, M. Greenblatt, S. Rojas, La<sub>1.5</sub>Sr<sub>0.5</sub>NiMn<sub>0.5</sub>Ru<sub>0.5</sub>O<sub>6</sub> Double Perovskite with Enhanced ORR/OER Bifunctional Catalytic Activity, *ACS Appl. Mater. Interfaces*, 2019, **11**, 21454-21464.
13. L. An, Z. Zhang, J. Feng, F. Lv, Y. Li, R. Wang, M. Lu, R. B. Gupta, P. Xi, S. Zhang, Heterostructure-Promoted Oxygen Electrocatalysis Enables Rechargeable Zinc–Air Battery with Neutral Aqueous Electrolyte, *J. Am. Chem. Soc.*, 2018, **140**, 17624-17631.
14. X.-T. Wang, T. Ouyang, L. Wang, J.-H. Zhong, Z.-Q. Liu, Surface Reorganization on Electrochemically-Induced Zn–Ni–Co Spinel Oxides for Enhanced Oxygen Electrocatalysis, *Angew. Chem. Int. Ed.*, 2020, **59**, 6492-6499.
15. X. Wang, Z. Pan, X. Chu, K. Huang, Y. Cong, R. Cao, R. Sarangi, L. Li, G. Li, S. Feng, Atomic-Scale Insights into Surface Lattice Oxygen Activation at the Spinel/Perovskite interface of Co<sub>3</sub>O<sub>4</sub>/La<sub>0.3</sub>Sr<sub>0.7</sub>CoO<sub>3</sub>, *Angew. Chem. Int. Ed.*, 2019, **58**, 11720-11725.
16. P. Li, J. Wen, Y. Xiang, M. Li, Y. Zhao, S. Wang, J. Dou, Y. Li, H. Ma, L. Xu, Hierarchical mesoporous N-doped carbon as an efficient ORR/OER bifunctional electrocatalyst for rechargeable zinc–air battery, *Inorg. Chem. Front.*, 2024, **11**, 5345-5358.
17. Z.-D. Wang, C.-K. Bai, X.-Y. Chen, B.-D. Wang, G.-L. Lu, H. Sun, Z.-N. Liu, H. Huang, S. Liang, H.-Y. Zang, Co/Co<sub>9</sub>S<sub>8</sub> nanoparticles coupled with N,S-doped graphene-based mixed-dimensional heterostructures as bifunctional electrocatalysts for the overall oxygen electrode, *Inorg. Chem. Front.*, 2019, **6**, 2558-2565.
